# Supplementary material
Source: PubMed Central journal article supplement (PMC7855068)
Supplement: NIHMS1633127-supplement-1.pdf [file NIHMS1633127-supplement-1.pdf]

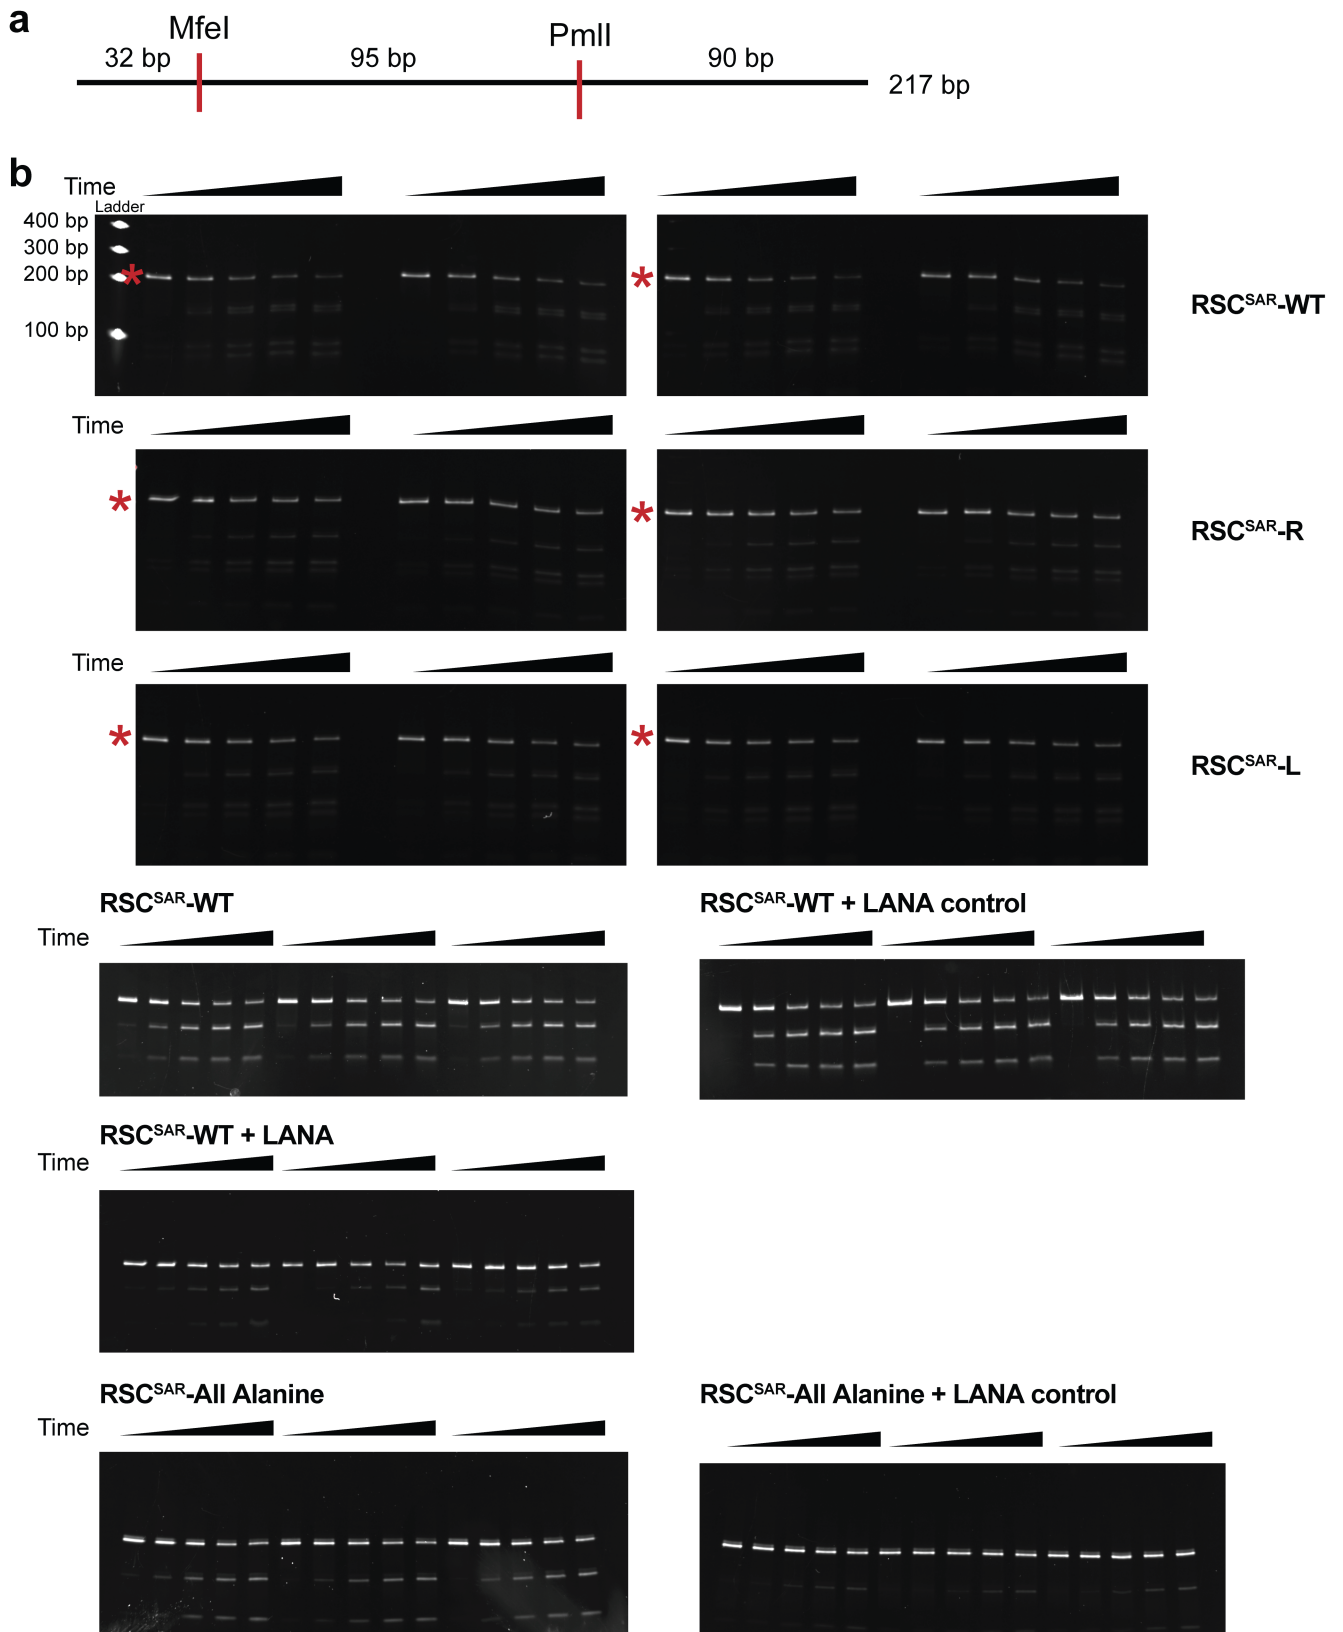

**Supplemental Figure 1 | Gel images for nucleosome remodeling assays. a**, DNA substrate used for the restriction enzyme accessibility assays: A 217 bp DNA fragment with the MfeI and PmlI restriction sites. **b**, Gel images for remodeling assays. Gels shown were quantified and shown in Figure 6 and Extended Data Fig. 10.
